# Supplementary material
Source: publisher figshare collection journal article supplement (https://gsajournals.figshare.com/articles/dataset/_/9841160)
Supplement: Supplementary file 1 [file 1]

**Supplemental Figure S1** Assembled genomic sequences of *GADD45G*-like gene locus of *P. reticulata*. Translated coding sequence (upper case) of the 151 (in reverse orientation, blue) and the 137 (yellow) amino-acid isoforms are annotated.

gggggcgggcgggcgggcgggcgggcgccgtgctagccccgggcatgctagctcctcaggagcgcccaggaaaga  
 accggaacagagaatcatcccggtcgggatgaggatttccagggtgtgaacggatcaggtagcgggcagag  
 agccgggtTCAGCGCTCCGGGAGGCTGATCTCAGGAACCCAGTCGTTTCAGCCGCCGGCTCTCCTCGCAG  
 - R E P L S I E P V W D N L R R S E E C  
 AACAGGTGCAGCTTCTCCAGAGCCGGGTCTGTCCTCAAGACCCATCGGCCGGGTctgttggagccacagg  
 F L H L K E L A P D D W S G D A P N  
 aggagcgtagtagcagggaaacagctgctgagcaggggaggagctacaaggctcacaaggggccataaca  
 acacaaatatggggggatgttctactgttagcatctataatgaaaatcagctgcaagtgttggaaattta  
 ttgggtttcagggtgggaaataaaatagccgactccaaattctgactcgttgattgtgtgtaaaagaaatat  
 atataggtttgcagaaattaatttggccaaaatatgtcttaagctaacaaaaaattaaagtccactttt  
 ttaagtgtaaaaattaaatatatctgttaagtttttctgttttattttgtatttatcagaacattaatg  
 tattattgatggggcgcagccccctgagccacccccgtcgttccgcccctggtcgtacCGTAATCAGG  
 T I L  
 ACGCAGTGCAGCTCTTCTGCTCGTCTCCGACGATGTCGACCAGACGCTGCGTGTGCTGACTCTGACG  
 V C H A D E Q E D G V I D V L R Q T D S V R V  
 ATGCTGATGTGCTGTGTCGAAGCAGAAGGACTGGATGAGGGTGAAGTGGATCTGCAGGGCCACGTCCAC  
 I S I D N D F C F S Q I L T F H I Q L A V D W  
 TCGAACTGCTCGTCTGTGGCCAGGACGACGAGAACGACACGCTGTCCGGGTCTctgtggaaacaaaccggg  
 E F Q E D T A L V C F S V S D P D  
 tcagaccgggtcgggaaccaaaccgaccatcagcggatctccaaacttacAGGTTTCATGACTTTGGCGC  
 L N M V K A C  
 ACTCGTAGACTCCACGGTGAGAGACTGGTTGTCTTTAGCCGAGACCAGAACTTCTTCCAGGGCTGCGC  
 E Y V G V T L S Q N D K A S V L V E E L A A G  
 CTGCGCACTGAGCGCGCTCGGCGGGCTTCTGGATCAGAACCCTCTTCAAAAAGTCATgatgcagccggtga  
 A C Q A R E A P K Q I L V E E F T M  
 ggatgaggatattccaggaggaggaagagcggttggagcggagcggttcacagctgctcttatagccc  
 cgcagctcgtgcggcgcagagaaagcggcgcgcgctgattggctgcggctgaatggcgattgatgtga  
 taatgcttttgtcacacttttggtcgtggcagattgatgggggtcacgcgcgctcccccttctgcacgc  
 aaacaaaaggaaaatatattaggtttcaagttttagtttgagcagaaggcagattcactttccctcttca  
 tgcactcaaaaaaattcacaagaaatgaaacgaatttatctcatttttaatcccaaactaccagcagat  
 gcgtgattttgtcattttgtcttaaaatcaacaaatctttgcactgatggggtcaaagaaaagctaaa  
 tatgaagtttctgcagaatggaaacagtttcatgttttagtttttgataaatccacaacagcttact  
 ttgtcacttcatgcatttataaaatgtacaaaaataaaactgttttttttttaagttaaagtacaac  
 cagaagtgcaaaattgtcattttgcaataaaaaatgcaaccgaatcggtgcattcatgggaatctgacaa  
 agttttctgcagagtggaacagtttcacgtgaaactgttgcggttttatgcaaaaactgaaacttttc  
 cacgtcacgcagtcataaaattcacaaaaataaaacagacttctgtcaggtttaagccttagtttcaga  
 catgagtgtgttttaaatgtccgcgtcgctggtttcctgctcgtttcttcatgtttgcagctttgct  
 gctcagatggagccgggaagtgagaagccccgccccccacgcggcggcaggtggaccggaccatctgt  
 ggactagaagcggggccgtaaaaccacggcattgttttactgaagccccactttttatcaccccccc  
 ccccgtcaccccccgtcaccccccttatctcctccatacaaatgcaaatgcgcagcgcgtgccagaact  
 gaacaaactccacgtgggtcatcagctgtccgttttttacaccggagaaacttttacacacttttaaa  
 ctacgcacagagttttaatttgaagaatttaagagtttttgctgtattttgtttgttttacgac  
 tttttgcggttttacgcatttagaggtccaaacttgaactgagaatagatgaaactatatcagatgaaa  
 aacttcagtaaaaaatcggttttttaaatcaaatatctgatttaacaggatttttagtttttagagt  
 aaagataaaactttgtcacattagatttcaataaagagtcaaaaaataaatcacatttcaaagtgtacttt  
 atcgcgtgatttcaacttttccgcaagcttatttgggcactaatagcgcaaatctcccccatatttgc  
 cttttttaatttgcatacattcagtgaaaccccatcttgcgtgcggctcgctgctgccgatgaata  
 gctgaggaggggagcagaggttggcgctgattgattcagcgctattgttctgcggcagatggagaactg  
 tcgctatggacggaggggggggggggggtttgacccgcagacccccctccaggggttcggccagcttttg  
 tctgcgatcctccaaattctgcagcctgttgtctgagttctgattaaatctaaactccaaacaggagaa  
 atgggtccgaagcgttccacctgaagccggaggtcgtttttagtttggggtgtaaacatgttttattta  
 ccggtaacctgttccatgttggggcgccaaatatatgacaaaattacttctcgtcccaatttttagtgac

gtaaagttaaaaaagccaacaagagataatttgttccattattctgtcaaatctgctttttattttcttct  
 taaaggttttccagccatttggcatttttttagctttacgccactaaaaattgtgaataacaataaggag  
 aaatcatttttccacctttatttgggtgccccatctaacatggcgcccagccattattgaggctctgct  
 acatgggatcaataaagttctaatacagcatttttagtggtgtaaacataaaaaatgtcagctagattta  
 ttttccagccttgtttggcgccccgctagcgcagcgccctacattagcaatatgctttttctttcccc  
 ttaaaagactgttcttgtcattttgtctgtttttcacagtttttagtggtcaaaactaaaaggtaataga  
 aataattttccaccttggttggcgccccctaaatgtggcgcccctatgtgttcagcctttacttctc  
 cttaaaagggtttacggtgattattgtcaaatattaaagaattttgtgacgcatcaaccgaaatccta  
 caaactttatgataatctggagttgaaatgaaactcttcatttcttactctcctgtttttattttttca  
 ccttcttcttcttccactcttggttcgcgccgctccagggatgattcggtcatcccgactgatccgg  
 acacggttctgctgcagaaacgatcagctttcacggcaacaggccggcgctgcacatcgatccacac  
 acagcttttgttgcggtgcgcatctgctccgtttgcgcctctaatactgatggagaagtgcggcaccg  
 cagcgctgcgggtgcatgtctgcgggttgtttgactcccagggctcagcaggtgctgcctttgtccgcc  
 cccccacccccccctccctctcccactcgggacagatggtgtccctcgagcgctgataaaggacatg  
 agagcacgtgaccgcgcgcgcgcagatgccacgcgcgcggacggagcagcgcgctggcacttctga  
 tccttaaagcgaggaaacacgctgtggaataaccacggagatgttaccgtggaaactccgttctcact  
 cttgaaacgttaaatgggtccaccaacagggggcgctgattaaagagtcacacaaccaatcagtttatt  
 tgtttcacacgtttcagcaacaagacatttcagagatttacgtcaaaaacacaaaaatcaacaaatgaa  
 acatgacattttctcagatcggtacagatcagattattgattgtttcattgattacgtttcaaatcaac  
 tctaaccaggcgagtttttagtctagatttaaaggcactcagtggttcagctgttttacagttttctgg  
 aagtttgttccagatctgtggtgcatagaaactgaatgctgcttctcctcgtctggttctggttctttt  
 tagaccagaaccagaagatctgaggggtccagacgggttggtacagcaataacagatctttaatgtattg  
 tgggtgctaaaccgttcagtgatttataaactaacatcagtattttaaagtctattctctgagctacagg  
 gagccagaggagggtactttaaaactgggtgtgatgttctctatcctcctggttttagtcagaacagcagc  
 agcagcttctggatcagctgcagctgattgattgatttatttagtcagacctgtgaagacgctgttgcag  
 gaatcaatgcggttaaagataaacgcagtgatgatttctctagatcgtgctgagacatcagtcctcta  
 atcctggagatgttcttcagggtgatagaaggccgactttgtgactgtcttaatgtggctctgaaggttc  
 aggtcagtttctagctgtaataactgaccagattgttcttttagatccaaagatattgatctcagttttg  
 ctcccataaaaagctgtagaaggttttgacaccacatagtgattcttgccttcagagcttttagctgcag  
 gactcctgcagttttttacatgaataaacttagaagtgcagtttctacgtctaaacccttttgacacg  
 agccgactgactttctgagagttttctaaagacacgcgtccctcaggggtggggagggggccgcagtcgg  
 tcgatgcttttgcctgaagggaaccaatcaggcggcgaacgcgtgccgactccgcgtataaaaagccc  
 accgactctcaggaagatcaaattatttccctcttcacgttctgagctcaacaaacc**ATGAAGTCTCCTG**  
 M K S P  
**GAAAGTCCTTGAAGGAAGCCCTGGTCTGCGCTCAGAGCGAAAAACCGGCTCACTGTTGGCGTCTACGAAA**  
 G K S L K E A L V C A Q S E N R L T V G V Y E  
**GCGCTAAGATCATGACAGA**gtgagaaaactttcatttttcttgcctttttcatgcgtcctgtgtgagttt  
 S A K I M T E  
 ttcccagcagctgctaacaggaagagcggttttctgtccacag**AGACCCGGACAGCGTGTCTGCTTCTGCGT**  
 D P D S V S F C V  
**CCTGGCCACAGACGAGCAGTTCGAGTGGGACGTGGCCCTGCAGATCCACTTCACCCCTCATCCAGTCTCTT**  
 L A T D E Q F E W D V A L Q I H F T L I Q S F  
**CTGCTTCGACAACGACATCAGCATCGTCAGAGTCAGCGACACGCAGCGTCTGGCCGACATCGTCGGAGA**  
 C F D N D I S I V R V S D T Q R L A D I V G D  
**CGAGCAGGAAGACGCGCACTGCGTCTGATTACG**gtacgaccagggggcggaacgacgggtgggctcag  
 E Q E D A H C V L I T  
 gggggctgcggcccaacaataatacattaatgttctgataaatacaataaaaacaggaaaaacttacag  
 gatataatttaatttttacacttaaaaagtgtgactttaattttttagcttaagacataattttggcc  
 aaattaattttctgcaaacctatatatttcttttacaccaatcaacgagtcagaattttggagtcggct  
 attttatttccacctgaaaccaataaattccaacacttgcagctgattttcattatagatgctaacag  
 tagaacatcccccatatttgtgttgttatggcccccttggtagccttgtagctccgccccgtgctcagc  
 agctgtttccctgctaacgctcctcctgtggctccaacag**AACCCGGCCGATGGGTCTTGGGACGACCC**  
 N P A D G S W D D P  
**GGCTCTGGAGAAGCTGCACCTGTTCTGCGAGGAGAGCCGGCGGCTGAACGACTGGGTTCCTGAGATCAG**  
 A L E K L H L F C E E S R R L N D W V P E I S  
**CCTCCCGGAGCGCTGA**cccggtctctgcccgtcacctgatccgttcacacctggaaatcctcatcccg  
 L P E R -

[illegible]
